# Supplementary material
Source: PubMed Central journal article supplement (PMC5110048)

# A) reads mapping to PKD1 (chr16:2,136,711-2,187,899)

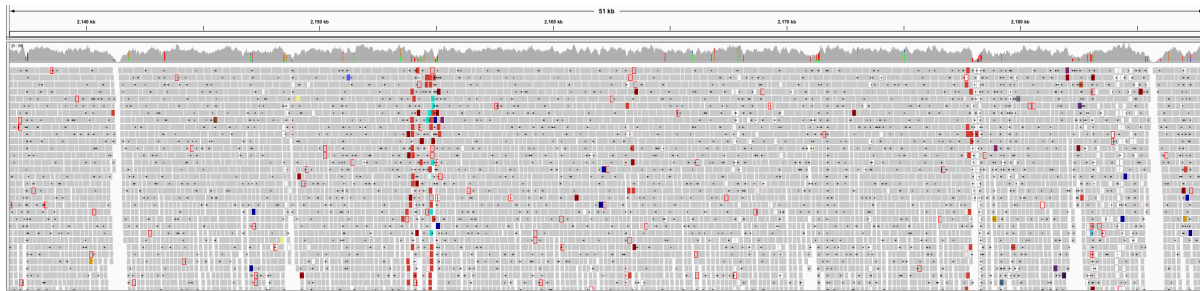

# B) reads mapping to PKD1P4 (chr16:18,428,258-18,446,140)

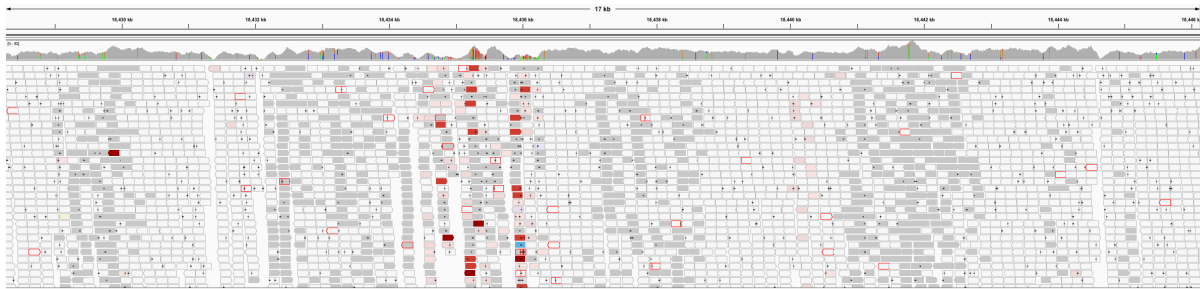

Supplement: ejhg201648x3.pdf [file ejhg201648x3.pdf]
